# Supplementary material
Source: PubMed Central journal article supplement (PMC5400694)
Supplement: NIHMS834803-supplement-supplementary_File.pdf [file NIHMS834803-supplement-supplementary_File.pdf]

**Supplementary Table S1: Primers**

| Name and Description                                                                            |          |   | Sequence                    | Product Size |
|-------------------------------------------------------------------------------------------------|----------|---|-----------------------------|--------------|
| Primers designed to test whether there was a chromosomal rearrangement between NR5A2 and KLHL29 | Primer 1 | F | 5'-GGCATAGTGAAAGAGCACTGG-3' | 108 bps      |
|                                                                                                 |          | R | 5'-GCCACTCGGAGTACTCTGCTA-3' |              |
|                                                                                                 | Primer 2 | F | 5'-TGCAGGAAAGAAACTGGGCA-3'  | 208 bps      |
|                                                                                                 |          | R | 5'-GCCTCATATCTGCCACTCGG-3'  |              |
|                                                                                                 | Primer 3 | F | 5'-CCCCAAATCGGAAGGAGTGT-3'  | 408 bps      |
|                                                                                                 |          | R | 5'-TGTGTATTCGGAGGATGGGC-3'  |              |
|                                                                                                 | Primer 4 | F | 5'-CTGGCCAGGACAAGGAAACT-3'  | 643 bps      |
|                                                                                                 |          | R | 5'-GGGGATGCCTCATATCTGCC-3'  |              |
| NR5A2 gene primers (spanning fusion site)                                                       |          | F | 5'-TGCAGGAAAGAAACTGGGCA-3'  | 856 bps      |
|                                                                                                 |          | R | 5'-GGCAGTTGGCCAAAGAAAGG-3'  |              |
| KLHL29 gene primers (spanning fusion site)                                                      |          | F | 5'-GCTCTGCCTCCCCGTAATAG-3'  | 853 bps      |
|                                                                                                 |          | R | 5'-AAATCGCACTGAGGAAGAGGG-3' |              |
| GAPDH mRNA                                                                                      |          | F | 5'-AGAAGGCTGGGGCTCATTG-3'   | 258 bps      |
|                                                                                                 |          | R | 5'-AGGGCCATCCACAGTCTTC-3'   |              |

**Supplementary Table S2:** Fusion transcript candidates grouped by genomic location (sample A1).

| <b>Fusion transcript <sup>a</sup></b> | <b>Left gene</b> | <b>Left chr ID</b> | <b>Coordinates on the left</b> | <b>Right gene</b> | <b>Right chr ID</b> | <b>Coordinates on the right</b> | <b>N<sup>b</sup></b> | <b>N<sup>c</sup></b> | <b>N<sup>d</sup></b> |
|---------------------------------------|------------------|--------------------|--------------------------------|-------------------|---------------------|---------------------------------|----------------------|----------------------|----------------------|
| Chr10-chr10 <i>ff</i>                 | C10orf68         | Chr10              | 32873231                       | CCDC7             | Chr10               | 32832227                        | 56                   | 1                    | 10                   |
| Chr13-chr13 <i>rr</i>                 | ENSG00000139597  | Chr13              | 33006925                       | N4BP2L2           | Chr13               | 33095585                        | 2                    | 2                    | 0                    |
| Chr9-chr9 <i>rr</i>                   | MPDZ             | Chr9               | 13205034                       | ENSG00000234740   | Chr9                | 13276769                        | 3                    | 2                    | 0                    |
| <b>Chr1-chr2 <i>fr</i></b>            | NR5A2            | Chr1               | 200067672                      | KLHL29            | Chr2                | 23698253                        | 6                    | 1                    | 9                    |
| Chr6-chr6 <i>rr</i>                   | MYLIP            | Chr6               | 16148001                       | ENSG00000251793   | Chr6                | 16148559                        | 3                    | 56                   | 0                    |
| Chr3-chr3 <i>ff</i>                   | ENSG00000242086  | Chr3               | 195416308                      | SDHAP2            | Chr3                | 195415403                       | 15                   | 99                   | 2                    |
| Chr20-chr20 <i>rr</i>                 | ENSG00000225065  | Chr20              | 33302393                       | NCOA6             | Chr20               | 33303168                        | 7                    | 12<br>9              | 0                    |
| ChrX-chrX <i>rr</i>                   | CLIC2            | ChrX               | 154563679                      | ENSG00000224216   | ChrX                | 154564557                       | 3                    | 14                   | 0                    |
| Chr12-chr12 <i>rr</i>                 | ENSG00000212127  | Chr12              | 11148552                       | TAS2R20           | Chr12               | 11150115                        | 2                    | 53                   | 0                    |
| Chr3-chr3 <i>rr</i>                   | ENSG00000249598  | Chr3               | 195686053                      | SDHAP1            | Chr3                | 195686956                       | 10                   | 13                   | 0                    |
| <b>Chr12-chr5 <i>ff</i></b>           | SUDS3            | Chr12              | 118825300                      | ENSG00000249129   | Chr5                | 177398635                       | 8                    | 33                   | 0                    |

*ff*, sense strand of left gene fused to sense strand of right gene; *fr*, sense strand of left gene fused to antisense strand of right gene; *rr*, antisense strand of left gene fused to antisense strand of right gene;  $N^b$ , number of reads showing fusion breakpoint;  $N^c$ , number of paired reads where one read maps entirely on the left and the other read maps entirely on the right of the fusion breakpoint;  $N^d$ , number of spanning mate-pairs where one end spans fusion (reads spanning fusion with only a few bases are included).

**Supplementary Table S3a. Expression levels of NR5A2-KLHL29FT in 15 matched colon cancer**

| <b>Sample ID</b> | <b>Database ID</b> | <b>Log2 relative RNA expression by qRT-PCR</b> | <b>Log2 RNA relative expression in tumor normalized to matched normal tissue</b> |
|------------------|--------------------|------------------------------------------------|----------------------------------------------------------------------------------|
| Sample 1-N       | 3848 N             | -4.7108                                        |                                                                                  |
| Sample 1-T       | 3848 T             | -12.1294                                       | -7.4186                                                                          |
| Sample 5-N       | 3791 N             | -7.6937                                        |                                                                                  |
| Sample 5-T       | 3791 T             | -3.6668                                        | 4.0269                                                                           |
| Sample 7-N       | 3457 N             | -5.1908                                        |                                                                                  |
| Sample 7-T       | 3457 T             | -7.6636                                        | -2.4728                                                                          |
| Sample 8-N       | 3615 N             | -4.7504                                        |                                                                                  |
| Sample 8-T       | 3615 T             | -13.9279                                       | -9.1775                                                                          |
| Sample 11-N      | 3841 N             | -7.9602                                        |                                                                                  |
| Sample 11-T      | 3841 T             | -10.0088                                       | -2.0486                                                                          |
| Sample 12-N      | 3785 N             | -10.8391                                       |                                                                                  |
| Sample 12-T      | 3785 T             | No products                                    | -5                                                                               |
| Sample 16-N      | 3876 N             | -8.5618                                        |                                                                                  |
| Sample 16-T      | 3876 T             | -11.4129                                       | -2.8511                                                                          |
| Sample 17-N      | 3891 N             | -11.3752                                       |                                                                                  |
| Sample 17-T      | 3891 T             | -9.2948                                        | 2.0826                                                                           |
| Sample 18-N      | 3900 N             | -5.4584                                        |                                                                                  |
| Sample 18-T      | 3900 T             | -8.571                                         | -3.0987                                                                          |
| Sample 20-N      | 3849 N             | -10.7722                                       |                                                                                  |
| Sample 20-T      | 3849 T             | -10.7164                                       | 0.0558                                                                           |
| Sample 21-N      | 3896 N             | -8.7955                                        |                                                                                  |
| Sample 21-T      | 3896 T             | -11.1227                                       | -2.3271                                                                          |
| Sample 22-N      | 3901 N             | -10.2564                                       |                                                                                  |
| Sample 22-T      | 3901 T             | -11.06                                         | -0.8036                                                                          |
| Sample 23-N      | 3915N              | -10.9447                                       |                                                                                  |
| Sample 23-T      | 3915 T             | -13.5562                                       | -2.6115                                                                          |
| Sample 24-N      | 3929 N             | -11.0378                                       |                                                                                  |
| Sample 24-T      | 3929 T             | -9.8847                                        | 1.1531                                                                           |
| Sample 25-N      | 3940 N             | -8.8420                                        |                                                                                  |
| Sample 25-T      | 3940 T             | -10.3876                                       | -1.5456                                                                          |

**Supplementary Table S3b. Sample IDs and matched primary sample IDs in our sample database**

| <b>Sample ID</b> | <b>Primary sample ID<br/>in our sample<br/>databases</b> | <b>Sample ID</b> | <b>Primary sample ID<br/>in our sample<br/>database</b> |
|------------------|----------------------------------------------------------|------------------|---------------------------------------------------------|
| 1                | 3848 (++)                                                | 14               | 3836 (-)                                                |
| 2                | H69 (-)                                                  | 15               | 3860 (-)                                                |
| 3                | H95 (+)                                                  | 16               | 3876 (+)                                                |
| 4                | H96 (+)                                                  | 17               | 3891 (+)                                                |
| 5                | 3791 (+)                                                 | 18               | 3900 (+)                                                |
| 6                | 2874 (-)                                                 | 19               | 3925 (-)                                                |
| 7                | 3457 (+)                                                 | 20               | 3849 (+)                                                |
| 8                | 3615 (+)                                                 | 21               | 3896 (++)                                               |
| 9                | 3923 (-)                                                 | 22               | 3901 (+)                                                |
| 10               | 3908 (-)                                                 | 23               | 3915 (+)                                                |
| 11               | 3841 (+)                                                 | 24               | 3929 (+)                                                |
| 12               | 3785 (+)                                                 | 25               | 3940 (+)                                                |
| 13               | 2945 (-)                                                 |                  |                                                         |

++, homozygous for KLHL29 insertion; + heterozygous for KLHL29 insertion; -, homozygous wild-type
